# Supplementary material for: Distinct Roles for the Anterior Cingulate and Dorsolateral Prefrontal Cortices During Conflict Between Abstract Rules
Source: PubMed Central journal article supplement (PMC5939207; doi:10.1093/cercor/bhw350), 2016-11-22
Supplement: boschinetalcc2016_supplementarymaterial.pdf [file boschinetalcc2016_supplementarymaterial.pdf]

# Supplementary Material

## REGIONS OF INTEREST (ROI)

**DLPFC**

**ACC**

**Brodmann areas**

| ID | 8L | 8R   | 9L   | 9R   | 46L  | 46R  | TOTAL | 24L  | 24R  | 32L  | 32R  | TOTAL | TOTAL ROI | TOTAL VOL |
|----|----|------|------|------|------|------|-------|------|------|------|------|-------|-----------|-----------|
| 1  | 0  | 6072 | 0    | 2880 | 0    | 104  | 9056  | 0    | 1272 | 0    | 5048 | 6320  | 15376     | 30192     |
| 2  | 96 | 0    | 5416 | 0    | 1520 | 0    | 7032  | 0    | 0    | 4128 | 0    | 4128  | 11160     | 20864     |
| 3  | 0  | 0    | 0    | 0    | 0    | 0    | 0     | 2285 | 1540 | 1489 | 2001 | 7315  | 7315      | 39014     |
| 4  | 0  | 136  | 0    | 2432 | 0    | 5320 | 7888  | 0    | 0    | 0    | 0    | 0     | 7888      | 49984     |
| 5  | 0  | 0    | 32   | 0    | 464  | 0    | 496   | 0    | 0    | 0    | 0    | 0     | 496       | 1384      |
| 6  | 0  | 0    | 3144 | 0    | 6760 | 0    | 9904  | 0    | 0    | 1040 | 0    | 1040  | 10944     | 34960     |

Lesion volumes in cubic mm

**Overall regions of interest**

**Specific Brodmann areas of interest**

| ID | OUT of ROIs VOLUME |      | OUT OF TOTAL VOLUME |     | ID | OUT OF ROIs VOLUME |       | OUT OF TOTAL VOLUME |       |
|----|--------------------|------|---------------------|-----|----|--------------------|-------|---------------------|-------|
|    | DLPFC              | ACC  | DLPFC               | ACC |    | 46                 | 24+32 | 46                  | 24+32 |
| 1  | 59%                | 41%  | 30%                 | 21% | 1  | 1%                 | 41%   | 0%                  | 21%   |
| 2  | 63%                | 37%  | 34%                 | 20% | 2  | 14%                | 37%   | 7%                  | 20%   |
| 3  | 0%                 | 100% | 0%                  | 19% | 3  | 0%                 | 100%  | 0%                  | 19%   |
| 4  | 100%               | 0%   | 16%                 | 0%  | 4  | 67%                | 0%    | 11%                 | 0%    |
| 5  | 100%               | 0%   | 36%                 | 0%  | 5  | 94%                | 0%    | 34%                 | 0%    |
| 6  | 90%                | 10%  | 28%                 | 3%  | 6  | 62%                | 10%   | 19%                 | 3%    |

**Table S1.** For each patient (ACC group = green, dLPFC group = blue), lesion volumes in mm<sup>3</sup> are reported for each general region of interest (ACC and dLPFC) and for specific Brodmann areas within the ROIs. Total ROI volume in the second rightmost column is calculated as the sum of the volume of damage across all general ROIs. Total volume in the rightmost column refers to the total volume of damage across the whole brain.

| Overall regions of interest |                    |      |                     |     |
|-----------------------------|--------------------|------|---------------------|-----|
| ID                          | OUT of ROIs VOLUME |      | OUT OF TOTAL VOLUME |     |
|                             | DLPFC              | ACC  | DLPFC               | ACC |
| 1                           | 59%                | 41%  | 30%                 | 21% |
| 2                           | 63%                | 37%  | 34%                 | 20% |
| 3                           | 0%                 | 100% | 0%                  | 19% |
| 4                           | 100%               | 0%   | 16%                 | 0%  |
| 5                           | 100%               | 0%   | 36%                 | 0%  |
| 6                           | 90%                | 10%  | 28%                 | 3%  |

**Table S2.** Percentage of lesion localized to each specific ROIs out of the lesion volume across all general ROIs (left) and out of total brain damage (right) for each patient.

| Specific Brodmann areas of interest |                    |       |                     |       |
|-------------------------------------|--------------------|-------|---------------------|-------|
| ID                                  | OUT OF ROIs VOLUME |       | OUT OF TOTAL VOLUME |       |
|                                     | 46                 | 24+32 | 46                  | 24+32 |
| 1                                   | 1%                 | 41%   | 0%                  | 21%   |
| 2                                   | 14%                | 37%   | 7%                  | 20%   |
| 3                                   | 0%                 | 100%  | 0%                  | 19%   |
| 4                                   | 67%                | 0%    | 11%                 | 0%    |
| 5                                   | 94%                | 0%    | 34%                 | 0%    |
| 6                                   | 62%                | 10%   | 19%                 | 3%    |

**Table S3.** Percentage of lesion localized to each specific Brodmann area of interest out of the lesion volume across all general ROIs (left) and out of total brain damage (right) for each patient.
